# Supplementary material for: Association between the Perceived Household Financial Decline Due to COVID-19 and Smartphone Dependency among Korean Adolescents
Source: Int J Environ Res Public Health. 2022 Mar 11;19(6):3303. doi: 10.3390/ijerph19063303 (PMC8951075; doi:10.3390/ijerph19063303)
Supplement: Supplementary file 1 [file ijerph-19-03303-s001.zip › ijerph-1579848-supplementary.pdf]

**Supplementary Table S1.** Contents of reliability analysis of categorizing smartphone dependency scale according to each item

| Category             | Items                                    | Average variance extracted | Composite reliability | McDonald's Omega |
|----------------------|------------------------------------------|----------------------------|-----------------------|------------------|
| Control failure      | Fail to reduce usage time                | 0.773                      | 0.891                 | 0.938            |
|                      | Difficult to control usage time          |                            |                       |                  |
|                      | Difficulty keeping time properly         |                            |                       |                  |
| Salience             | Difficulty concentrating on other things | 0.572                      | 0.8                   | 0.854            |
|                      | Continuous thinking of smartphone        |                            |                       |                  |
|                      | Strong urge to use smartphone            |                            |                       |                  |
| Problematic outcomes | Health problems due to use               | 0.478                      | 0.776                 | 0.779            |
|                      | Severe family conflict due to use        |                            |                       |                  |
|                      | Severe social conflict due to use        |                            |                       |                  |
|                      | Difficulty in work due to use            |                            |                       |                  |

Each item followed the type classification of the smartphone dependency scale developed by National Information Society Agency of Korea.
